# Supplementary material for: Dynamic sex chromosome expression in Drosophila male germ cells
Source: PubMed Central journal article supplement (PMC7873209; doi:10.1038/s41467-021-20897-y), 2021-02-09
Supplement: 41467_2021_20897_MOESM1_ESM.pdf [file 41467_2021_20897_MOESM1_ESM.pdf]

1           **Supplementary materials for Dynamic Sex Chromosome Expression in Drosophila**  
2                                           **Male Germ Cells**

3 Sharvani Mahadevaraju\*, Justin M. Fear\*, Miriam Akeju\*, Brian J. Galletta, Mara M.L.S.  
4 Pinheiro, Camila C. Avelino, Diogo C. Cabral-de-Mello, Katie Conlon, Stafania Dell’Orso,  
5 Zelalem Demere, Kush Mansuria, Carolina A. Mendonça, Octavio M. Palacios-Gimenez, Eli  
6 Ross, Max Savery, Kevin Yu, Harold E. Smith, Vittorio Sartorelli, Haiwang Yang, Nasser M.  
7 Rusan, Maria D. Vibranovski<sup>†</sup>, Erika Matunis<sup>†</sup>, and Brian Oliver<sup>†^</sup>

8 \* These authors contributed equally

9 † These authors jointly supervised this work

10 ^ Corresponding author

11  
12 **This PDF file includes:**

13           Supplementary figures and legends, and dataset, file, and movie descriptions

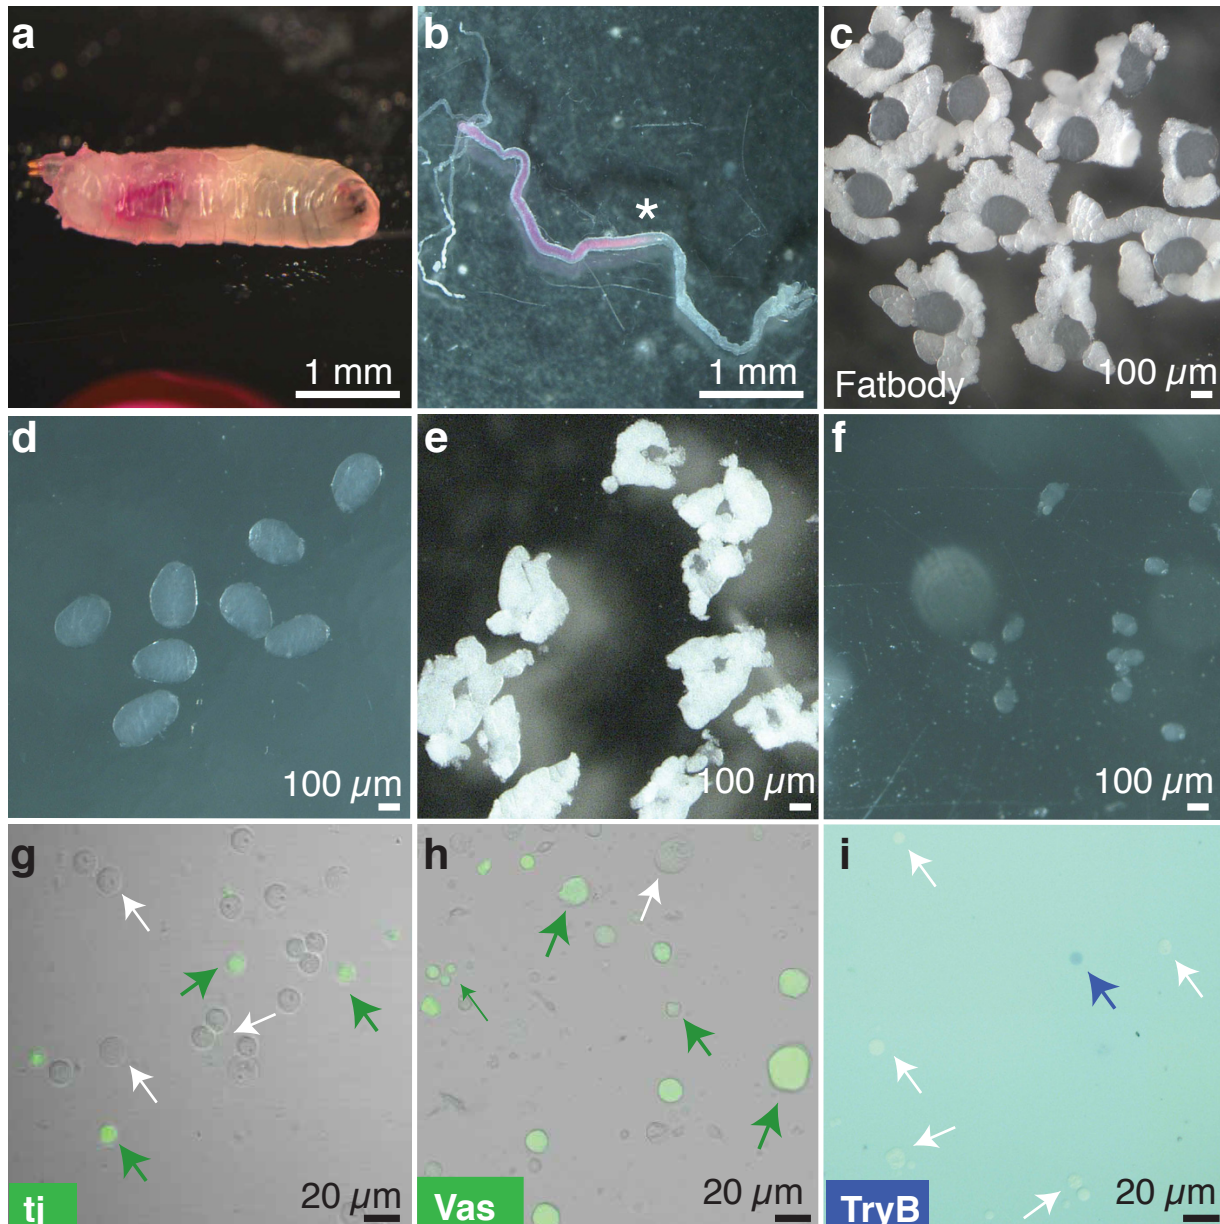

15  
 16 **Supplemental Figure 1. Preparation of Drosophila Larval testis samples for scRNA-seq.** (a)  
 17 Bright-field microscopic image of late third instar larva fed with Sulforhodamine dye media  
 18 (red). (b) Dissected larval gut with dye cleared from the foregut and remaining in the midgut and  
 19 hindgut but clear foregut. The boundary of food clearing in the midgut (\*). (c, e) Dissected larval  
 20 testes and ovaries with fatbody (white). (d, f) Testes and ovaries cleaned of associated fatbody.  
 21 Representative images (fluorescence and phase contrast) of dissociated cells marked for (g)  
 22 *traffic jam* expression in the cyst cells (*tj-GAL4>UAS-GFP*) and (h) *vasa* expression in the germ  
 23 cells (*VASA-GFP*), respectively (green arrows). Smaller *vasa* expressing cells (small green  
 24 arrows). Cells not expressing GFP were also visible (white arrows). (i) Trypan blue (TryB)  
 25 staining indicate dead (blue arrows) and live (white arrows) cells. White scale bars: **a-b** 1 mm, **c-**  
 26 **f** 100  $\mu$ m , Black scale bars: 20  $\mu$ m.  
 27

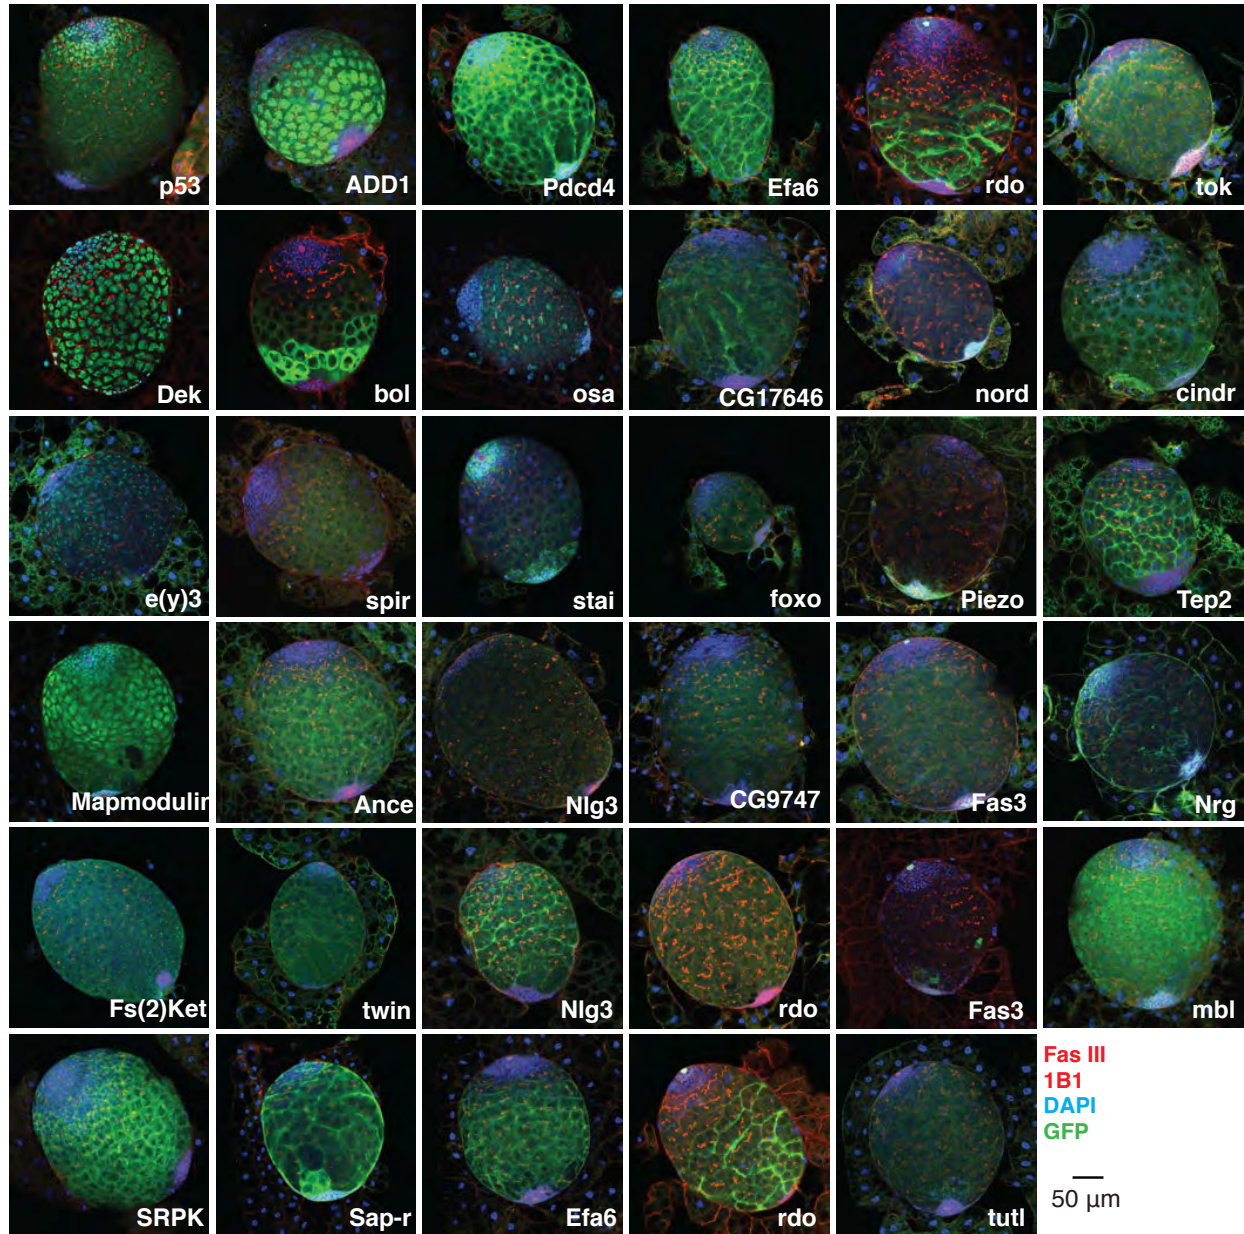

28  
29  
30  
31  
32  
33  
34  
35  
36

**Supplemental Figure 2. Immunofluorescence of protein traps used to annotate cell clusters from scRNA-Seq data.**

Immunofluorescence images showing protein expression of genes (green:GFP) from the protein trap reporters. Each panel consists of an individual gene (symbol) with color stained with anti-Fas III and 1B1 antibody (red), GFP (green) and counterstained with DAPI (blue). Black scale bar 50  $\mu$ m.



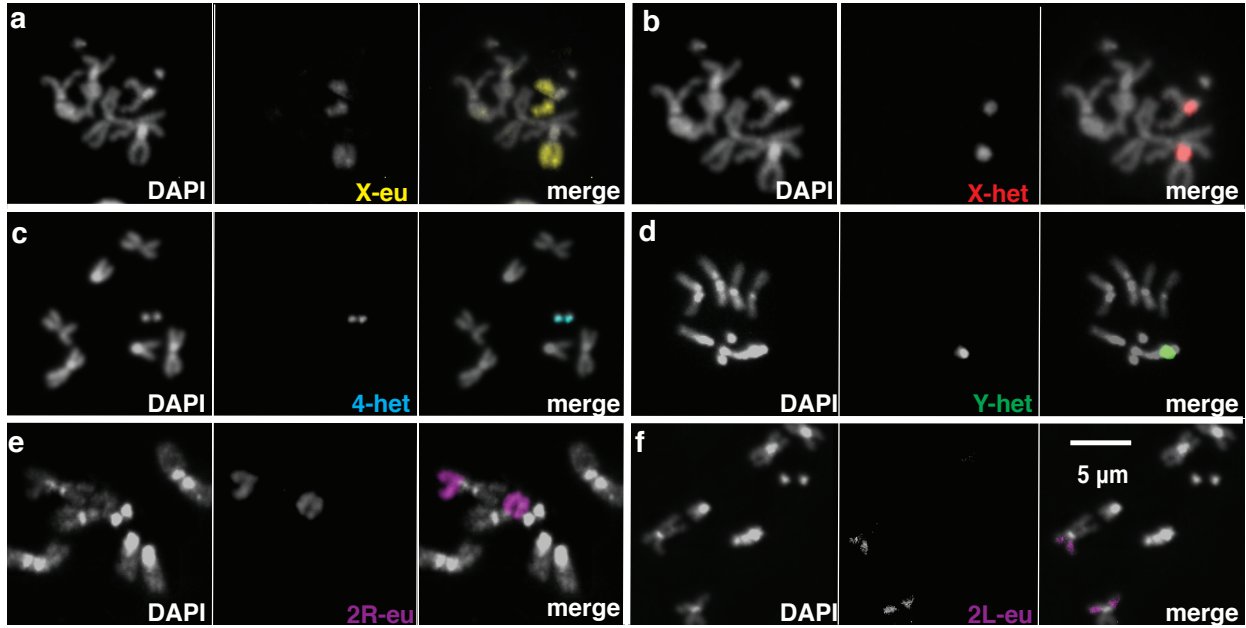

37  
 38 **Supplemental Figure 3. Spatial location of chromosomal territories in the Metaphase**  
 39 **chromosome spreads from the brain.** (a) Euchromatin oligopaints (yellow) detected a pair of  
 40 telocentric chromosomes in the genome indicating X euchromatin territory (b) 1.688 satellite  
 41 probe (red) detect the same telocentric chromosome in the same nucleus as in A, indicating the X  
 42 heterochromatin (c) AATAT probe detected a pair of dot chromosomes indicating the 4<sup>th</sup>  
 43 heterochromatin (d) AATAC probe detect the single chromosome indicating the Y  
 44 heterochromatin. Euchromatin oligopaints (purple) detect the large metacentric chromosomes in  
 45 (e) and (f) indicating either 2R or 2L euchromatin that is indistinguishable clearly. Nuclei  
 46 counterstained with DAPI (gray). White scale bar: 5  $\mu$ m.

47  
 48

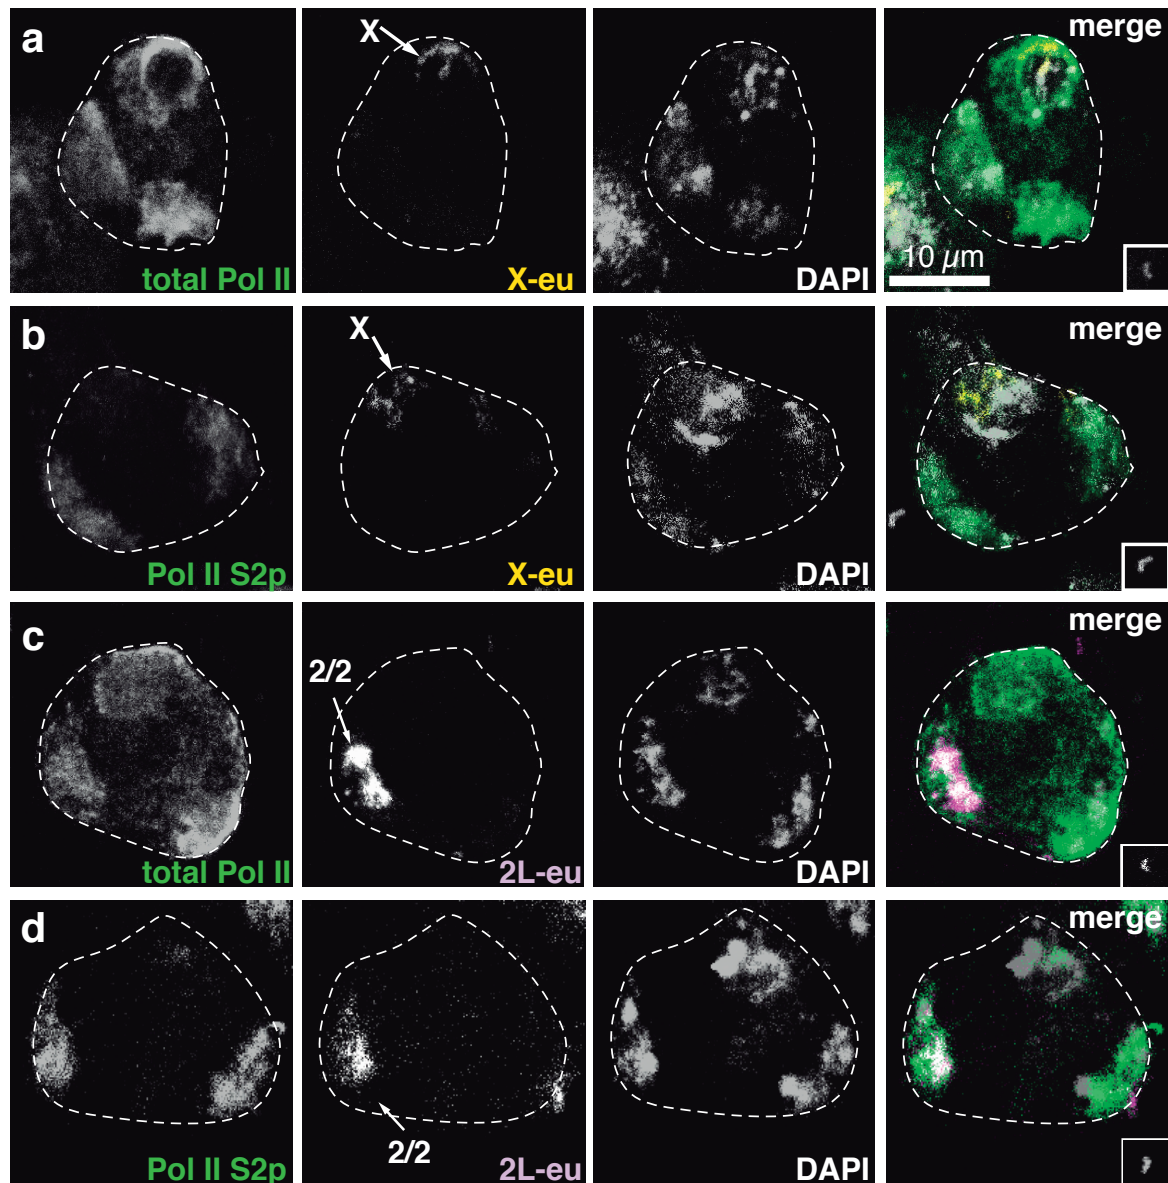

49  
 50 **Supplemental Figure 4. Localization of Total Pol-II and pSer2-CTD on X and 2L co-**  
 51 **stained with euchromatic oligopaints.**

52 Spatial localization of X chromosome euchromatin by oligopaints (yellow) with (a) total RNA  
 53 Polymerase-II (total Pol-II) and (b) Serine 2 phosphorylated Pol-II (Pol-II S2p). Spatial  
 54 localization of 2L chromosome euchromatin by oligopaints (purple) with (c) total Pol-II and (d)  
 55 (Pol-II S2p). DAPI (gray), primary spermatocyte nucleus is outlined (white-dashed line) based  
 56 on DAPI and bright-field images (not shown). Asterless stained centrioles used to stage  
 57 individual cells (insets). White scale bar: 10  $\mu$ m.

58  
 59

60 **Supplementary Datasets:**

61 **Supplemental Dataset 1.** Bulk RNA-seq data. Consists of four parts: a readme, summary  
62 of gene expression and sex-biased significance in each sample set, Chi-square test of  
63 independence, and *post-hoc* tests to determine the significance of sex-biased gene  
64 expression by chromosome elements. Supporting data for Fig. 1 and Fig. 2c,d.

65 **Supplemental Dataset 2.** scRNA-seq data. Consists of 14 parts: a readme, cell level data,  
66 gene level data, chromosome level data, Y-chromosome expressed genes, cluster level  
67 data, one vs rest differential expression, spermatogonia versus spermatocyte analysis,  
68 spermatogonia versus early primary spermatocyte, early primary spermatocyte versus  
69 middle and late primary spermatocyte, early primary spermatocyte versus middle primary  
70 spermatocyte, early primary spermatocyte versus late primary spermatocyte, middle  
71 primary spermatocyte versus late primary spermatocyte, and Gene Set Enrichment  
72 Analysis for bulk RNA-Seq experiments. Supporting data for Fig. 2b-e.

73 **Supplemental Dataset 3.** Comparing bulk and single cell RNA-seq data. Consists of four  
74 parts: a readme, gene level raw data for bulk RNA-seq of adult and larval gonads, rank  
75 correlations among bulk RNA-seq and scRNA-seq samples, and rank correlations by testis  
76 cell type. Supporting data for Fig. 1k and Fig. 2c.

77 **Supplemental Dataset 4.** scRNA-seq cell type annotation. Consists of three parts: a  
78 readme, genes used for cell type annotation of single cell data, and cross tabulation of  
79 overlap with protein traps. Genes include re-curated images from the and reporter genes  
80 from the Cooley lab that are shown to be expression in specific cell types of the testis in  
81 this work (bold).

82 **Supplemental Dataset 5.** Gene sets and chromosome elements. Consists of six parts: a  
83 readme, distribution of genes among Chromosome elements, pairwise comparisons of  
84 global expression between different cell types using different gene sets (all expressed,  
85 CTSP, Tαv, and TSPS), GO analysis of gene sets, X/A, 4/A, and Y/A ratio significance  
86 testing, pairwise significance testing for all chromosome elements by gene set. Supporting  
87 data for Table 1, Fig. 1b, Fig. 2e, and Fig. 4.

88 **Supplemental Dataset 6.** FlyBase Author's Resources. This provides a compendium of  
89 details about stocks, reagents, software, vendors, sources, code, and datasets used in this  
90 project, and where to find them. Also used by FlyBase for data curation.

91

92 **Supplementary Movie:**

93 **Supplemental Movie 1.** X and 2L chromosome spatial localization in primary  
94 spermatocytes. Spatial location of X chromosome euchromatin by oligopaints (yellow) and  
95 2L chromosome euchromatin by oligopaints (purple) within a primary spermatocyte. DAPI  
96 (gray), Asterless stained centrioles to stage individual cells (gray). Images are 'masked' in  
97 Imaris to obtain a 3D movie.

98
